# Supplementary material for: Composite Photocatalysts with Fe, Co, and Ni Oxides on Supports with Tetracoordinated Ti Embedded into Aluminosilicate Gel during Zeolite Y Synthesis
Source: MDPI journal article supplement (doi:10.3390/gels10020129), 2024-02-05
Supplement: s1 [file s1]

Supplementary data

# Comparative Effect of Fe, Co, and Ni Oxides Supported on Ti-Incorporated Zeolite Y on Photocatalytic Performances

Gabriela Petcu<sup>1,\*</sup>, Elena M. Anghel<sup>1</sup>, Irina Atkinson<sup>1</sup>, Daniela C. Culita<sup>1</sup>, Nicoleta G. Apostol<sup>2</sup>, Andrei Kuncser<sup>2</sup>, Florica Papa<sup>1</sup>, Adriana Baran<sup>1</sup>, Jean-Luc Blin<sup>3</sup> and Viorica Parvulescu<sup>1,\*</sup>

<sup>1</sup> Institute of Physical Chemistry "Ilie Murgulescu" of the Romanian Academy, 202 Splaiul Independentei, 060021 Bucharest, Romania; gpetcu@icf.ro (G.P.), manghel@icf.ro (E.M.A.), iatkinson@icf.ro (I.A.), dcu-lita@icf.ro (D.C.C.), floricapapa@gmail.com (F.P.), adibaran@gmail.com (A.B.), vpirvulescu@icf.ro (V.P.)

<sup>2</sup> National Institute of Materials Physics, Atomistilor 405A, 077125 Magurele, Romania; nicoleta.apostol@infim.ro; andrei.kuncser@infim.ro

<sup>3</sup> Faculty of Sciences and Technology, University of Lorraine, CNRS, L2CM, F-54000 Nancy, France; jean-luc.blin@univ-lorraine.fr

\* Correspondence: gpetcu@icf.ro (G.P.), vpirvulescu@icf.ro (V.P.)

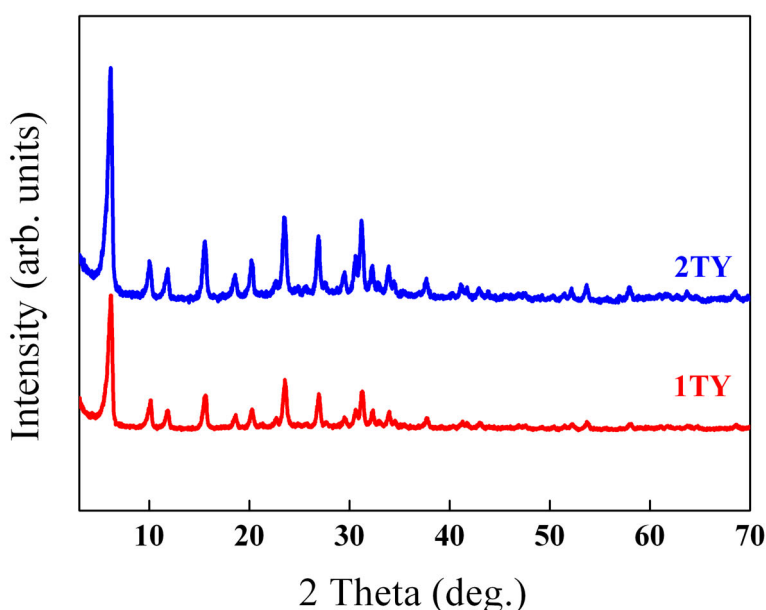

**Figure S1.** XRD patterns of Ti-zeolite Y supports.

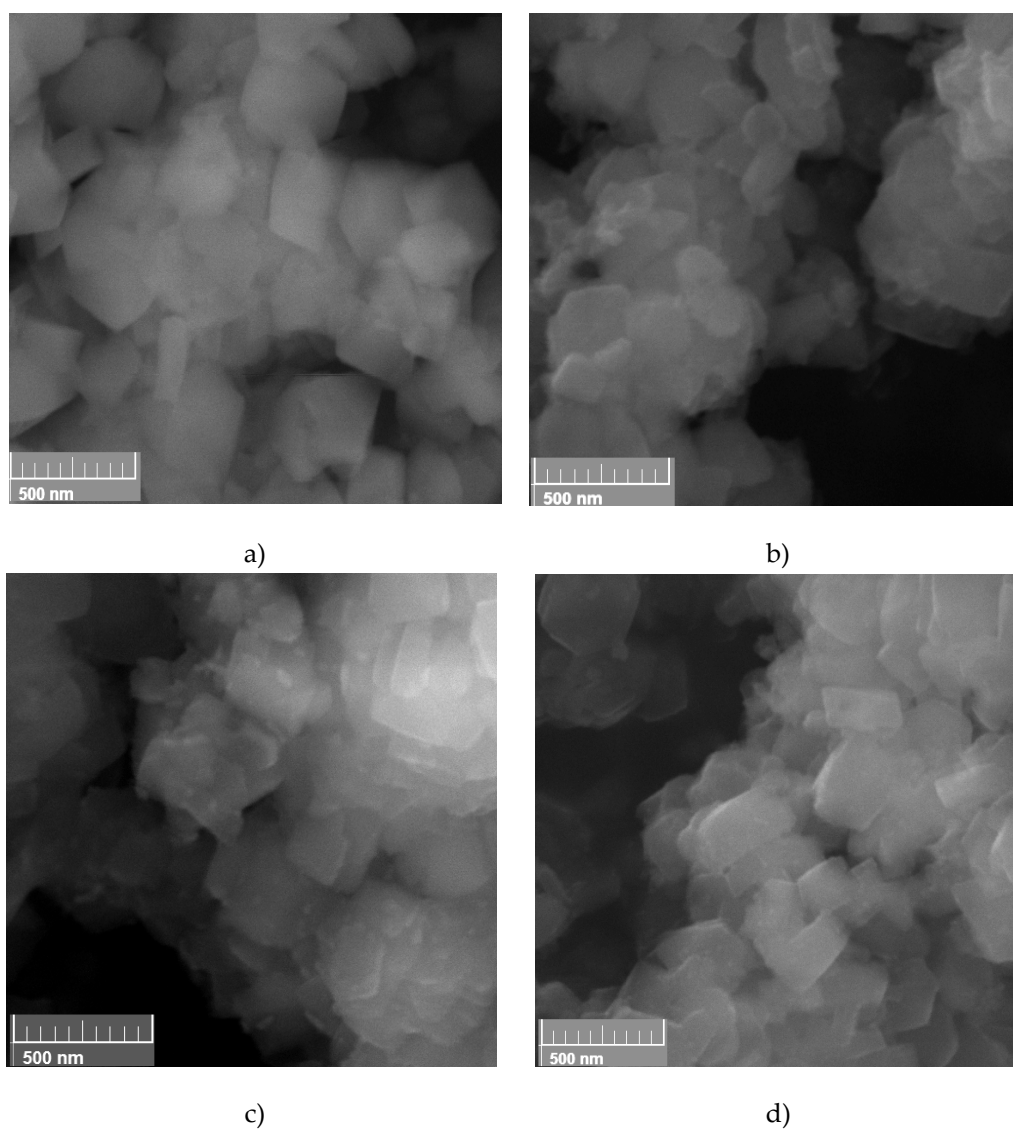

Figure S2. SEM images of a) 1TY, b) 1TYF, c) 1TYC, and d) 1TYN samples

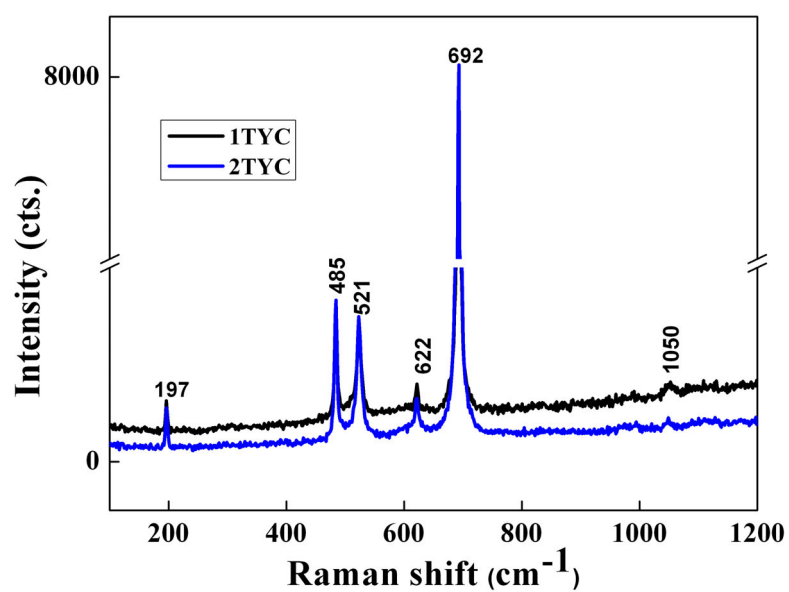

Figure S3. Vis-Raman spectra of the  $(\frac{1}{2})$ TYC materials.

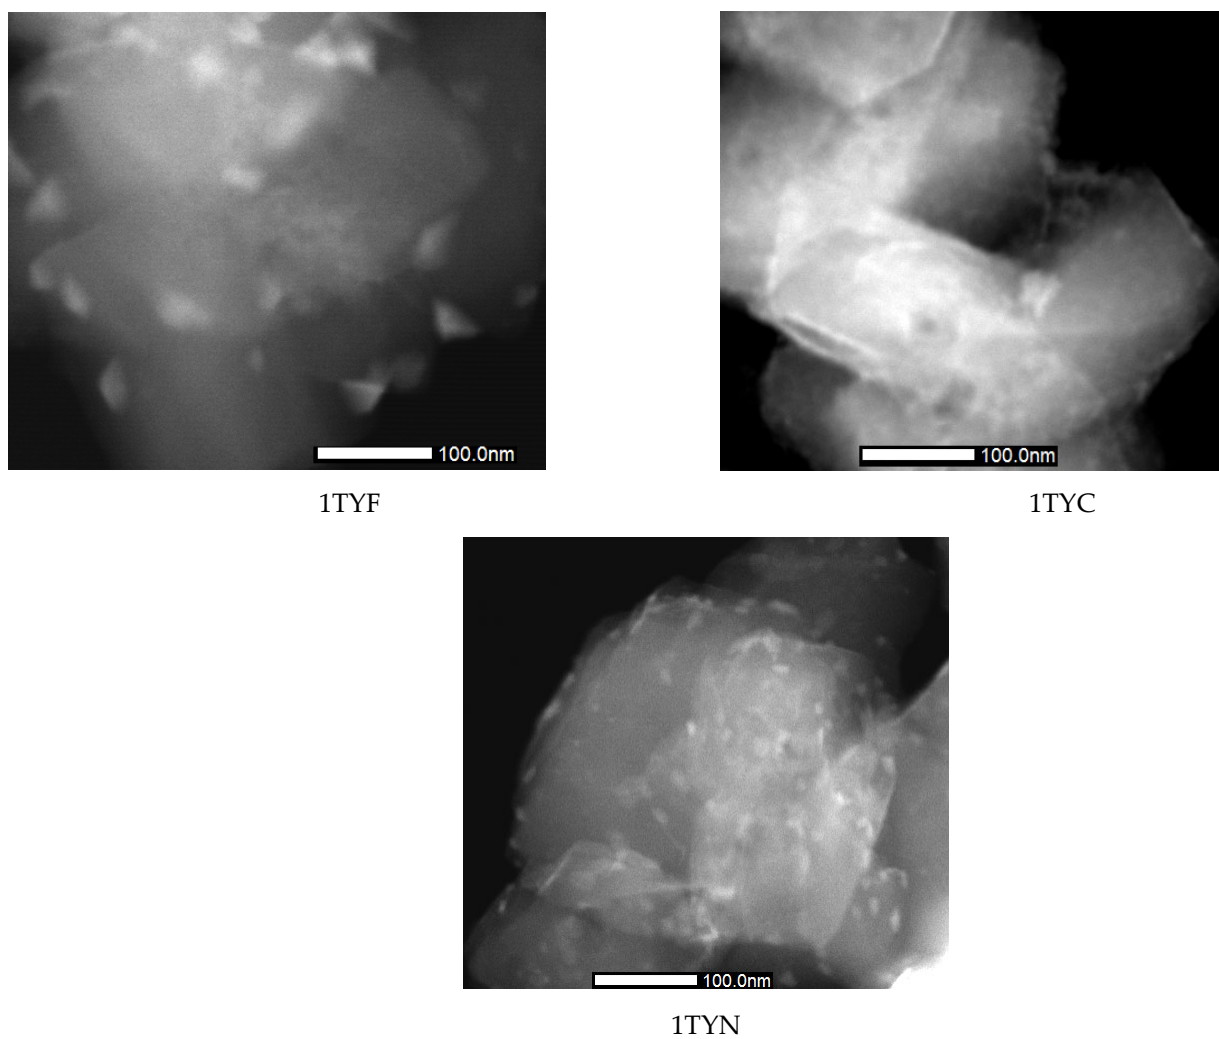

**Figure S4.** STEM images of the samples with Fe, Co, Ni supported on Ti-containing zeolite Y.

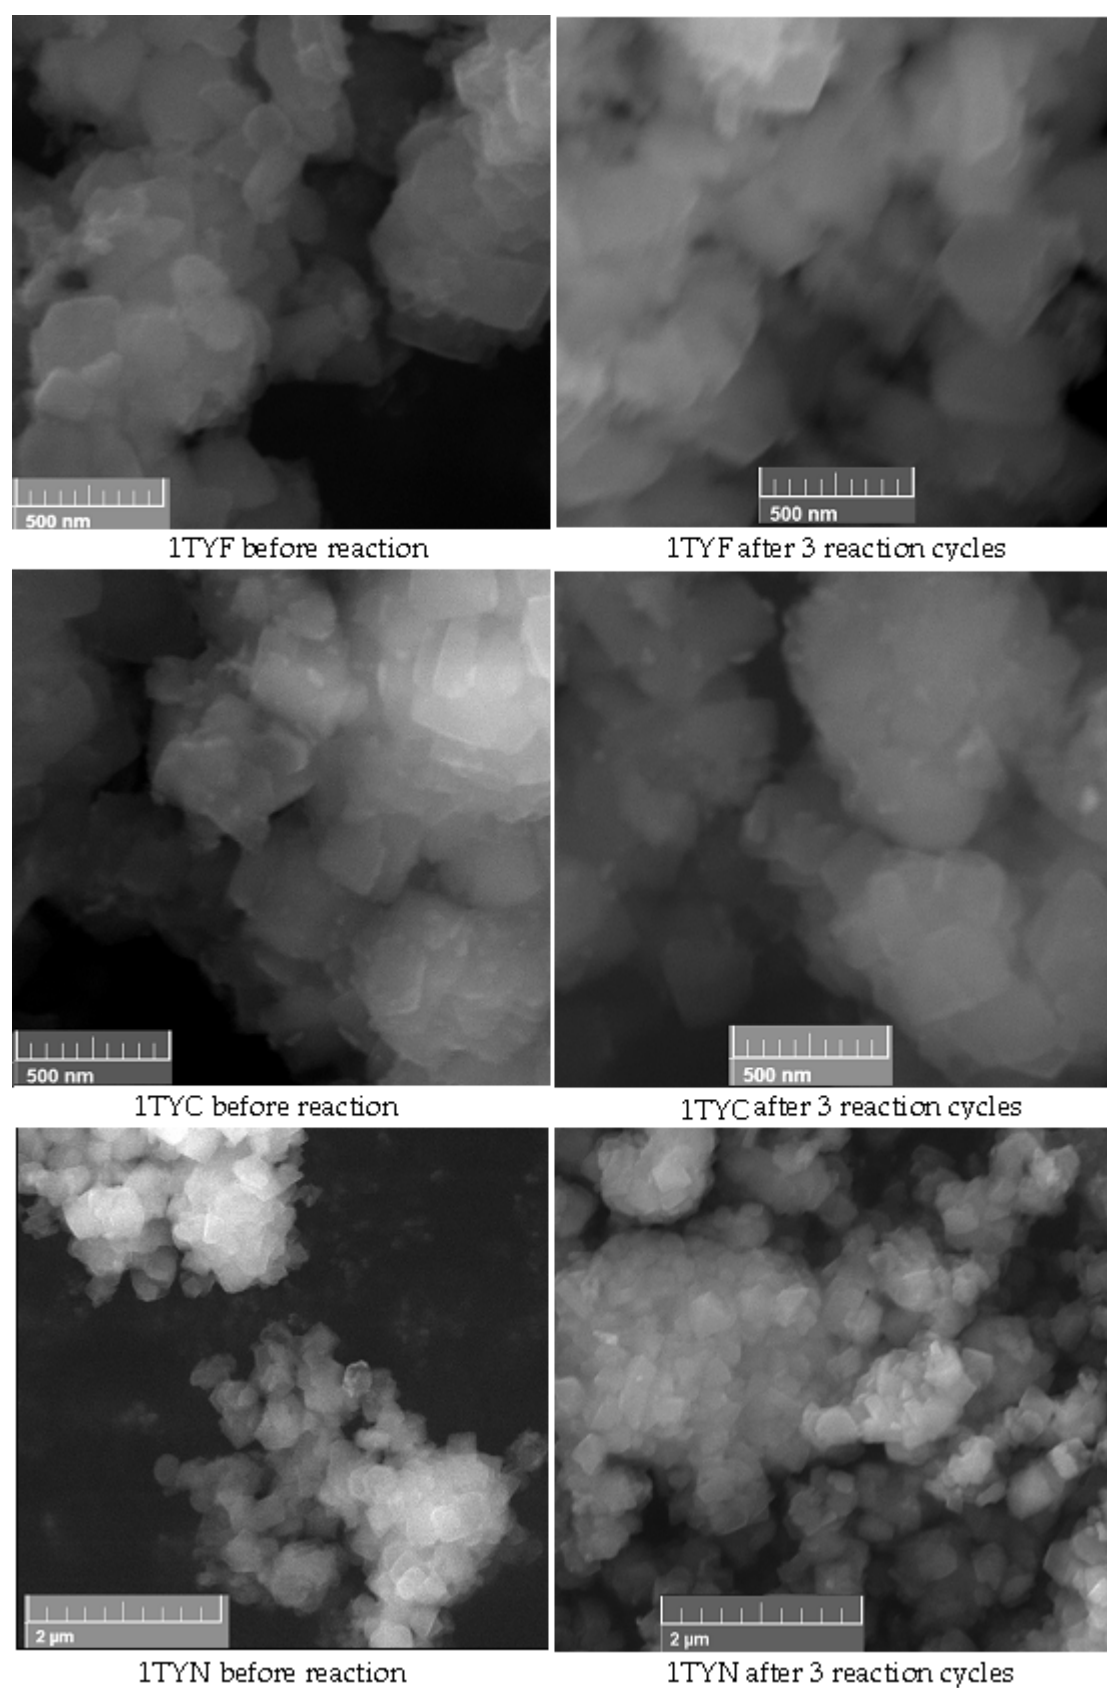

**Figure S5.** SEM images of the samples before and after photocatalytic reactions.

**Table S1.** EDX results.

| Element | keV   | 1TYF         |              | 1TYC         |              | 1TYN         |              |
|---------|-------|--------------|--------------|--------------|--------------|--------------|--------------|
|         |       | Weight,<br>% | Atomic,<br>% | Weight,<br>% | Atomic,<br>% | Weight,<br>% | Atomic,<br>% |
| O       | 0.525 | 62.62        | 47.41        | 59.75        | 44.40        | 57.59        | 41.74        |
| Al      | 1.486 | 7.13         | 9.11         | 6.37         | 7.98         | 3.31         | 4.05         |
| Si      | 1.739 | 27.72        | 36.84        | 31.44        | 41.01        | 35.75        | 45.47        |
| Ti      | 4.508 | 0.16         | 0.37         | 0.15         | 0.33         | 0.32         | 0.70         |
| Fe      | 6.398 | 2.37         | 6.27         | -            | -            | -            | -            |
| Co      | 6.924 | -            | -            | 2.29         | 6.28         | -            | -            |
| Ni      | 7.471 | -            | -            | -            | -            | 3.03         | 8.04         |
